# Supplementary material for: Hydroxy-Selenomethionine Improves the Selenium Status and Helps to Maintain Broiler Performances under a High Stocking Density and Heat Stress Conditions through a Better Redox and Immune Response
Source: MDPI journal article supplement (doi:10.3390/antiox10101542), 2021-09-28
Supplement: s1 [file s1]

## Supplemental Material

**Table S1:** Basal diet formulation and nutritional values<sup>1</sup>.

| Ingredients                        | Content, g/kg |
|------------------------------------|---------------|
| Corn                               | 638           |
| Roasted soybean                    | 300           |
| CaCO <sub>3</sub>                  | 10.0          |
| CaHPO <sub>4</sub>                 | 21.0          |
| Salt                               | 3.0           |
| Choline                            | 2.0           |
| Mineral premix <sup>2</sup>        | 5.0           |
| Vitamin premix <sup>3</sup>        | 0.5           |
| Amino acid premix <sup>4</sup>     | 19.6          |
| Total                              | 1000          |
| Nutrient composition (calculated): |               |
| Metabolic energy, MJ/kg            | 13.4          |
| Crude protein, %                   | 18.0          |
| Lysine, %                          | 1.08          |
| Methionine, %                      | 0.69          |
| Methionine + cysteine, %           | 0.92          |
| Calcium, %                         | 1.02          |
| Available phosphorus, %            | 0.47          |
| Selenium, mg/kg                    | 0.047         |

<sup>1</sup>The analyzed Se concentrations in the BD, SS, SY and OH-SeMet diets were 0.047, 0.345, 0.351, and 0.338 mg/kg, respectively. BD, basal diet; SS, BD supplemented with 0.3 mg Se/kg as sodium selenite; SY, BD supplemented with 0.3 mg Se/kg as seleno-yeast; OH-SeMet, BD supplemented with 0.3 mg Se/kg as hydroxy-selenomethionine.

<sup>2</sup>Trace mineral premix provided per kg diet: FeSO<sub>4</sub>•7H<sub>2</sub>O, 379 mg; CuSO<sub>4</sub>•5H<sub>2</sub>O, 31.3 mg; ZnSO<sub>4</sub>•7H<sub>2</sub>O, 177 mg; MnSO<sub>4</sub>•5H<sub>2</sub>O, 154 mg; and KI, 0.5 mg.

<sup>3</sup>Vitamin premix provided per kg diet: retinyl acetate, 1500 IU; cholecalciferol, 200 IU; rac- $\alpha$ -tocopheryl acetate, 50 mg; menadione, 5 mg; thiamin, 1.8 mg; riboflavin, 3.6 mg; calcium pantothenate, 10 mg; niacin, 35 mg; pyridoxol, 3.5 mg; *d*-biotin, 0.15 mg; and folacin, 0.55 mg.

<sup>4</sup>Amino acid premix provided per kg diet: *L*-lysine, 4,630 mg; *DL*-methionine, 4,160 mg; *L*-threonine, 2,600 mg; *L*-tryptophan, 355 mg; *L*-isoleucine, 2,010 mg; *L*-valine, 2,435 mg; *L*-phenylalanine, 1,365 mg; and *L*-arginine, 2,570 mg.

**Table S2:** Name, type, dilution, and source of primary antibodies<sup>1</sup>.

| Antibody | Isotype | Dilution | Source                  |
|----------|---------|----------|-------------------------|
| GPX1     | Rabbit  | 1:1000   | Abcam (Cambridge, MA)   |
| GPX4     | Rabbit  | 1:1000   | ABclonal (Wuhan, China) |
| SELENON  | Rabbit  | 1:1000   | ABclonal (Wuhan, China) |
| SELENOP  | Rabbit  | 1:1000   | Abcam (Cambridge, MA)   |
| SELENOS  | Rabbit  | 1:1000   | ABclonal (Wuhan, China) |
| SELENOW  | Rabbit  | 1:1000   | Made by our Lab         |
| TXNRD1   | Rabbit  | 1:1000   | Abcam (Cambridge, MA)   |
| TXNRD2   | Rabbit  | 1:1000   | Abcam (Cambridge, MA)   |
| CLAUDIN1 | Rabbit  | 1:1000   | ABclonal (Wuhan, China) |
| CLAUDIN2 | Rabbit  | 1:1000   | ABclonal (Wuhan, China) |
| OCCLUDIN | Rabbit  | 1:1000   | ABclonal (Wuhan, China) |
| GAPDH    | Rabbit  | 1:1000   | ABclonal (Wuhan, China) |
| ACTIN    | Rabbit  | 1:10000  | ABclonal (Wuhan, China) |

<sup>1</sup> ACTIN,  $\beta$ -actin; GAPDH, glyceraldehyde-3-phosphate dehydrogenase; GPX1 and 4, glutathione peroxidase 1 and 4; SELENON, P, S, W, selenoprotein N, P, S, W; TXNRD1 and 2, thioredoxin reductase 1 and 2.

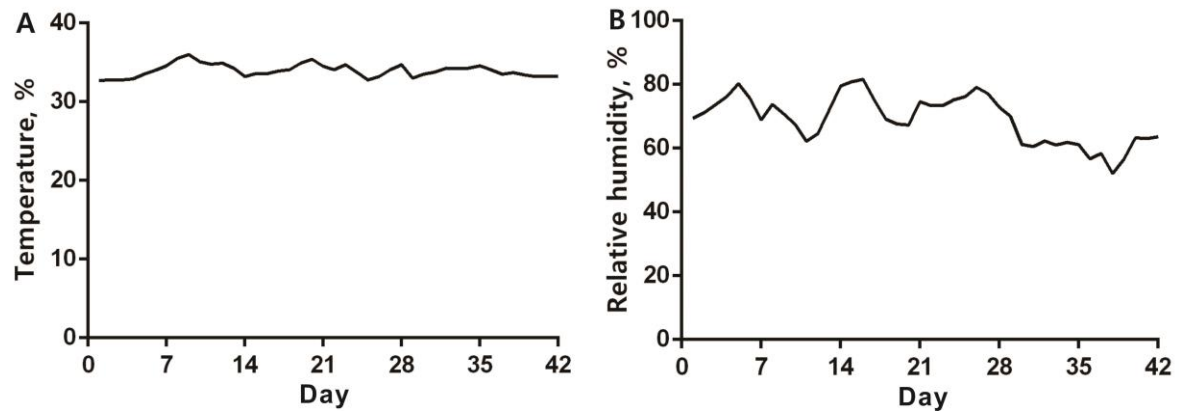

**Figure S1:** Daily average temperature (A) and humidity (B) of the environment. The temperature and humidity were recorded every hour from 9:00 a.m. to 5:00 p.m., and then the daily average temperature and humidity were calculated by these eight hours.

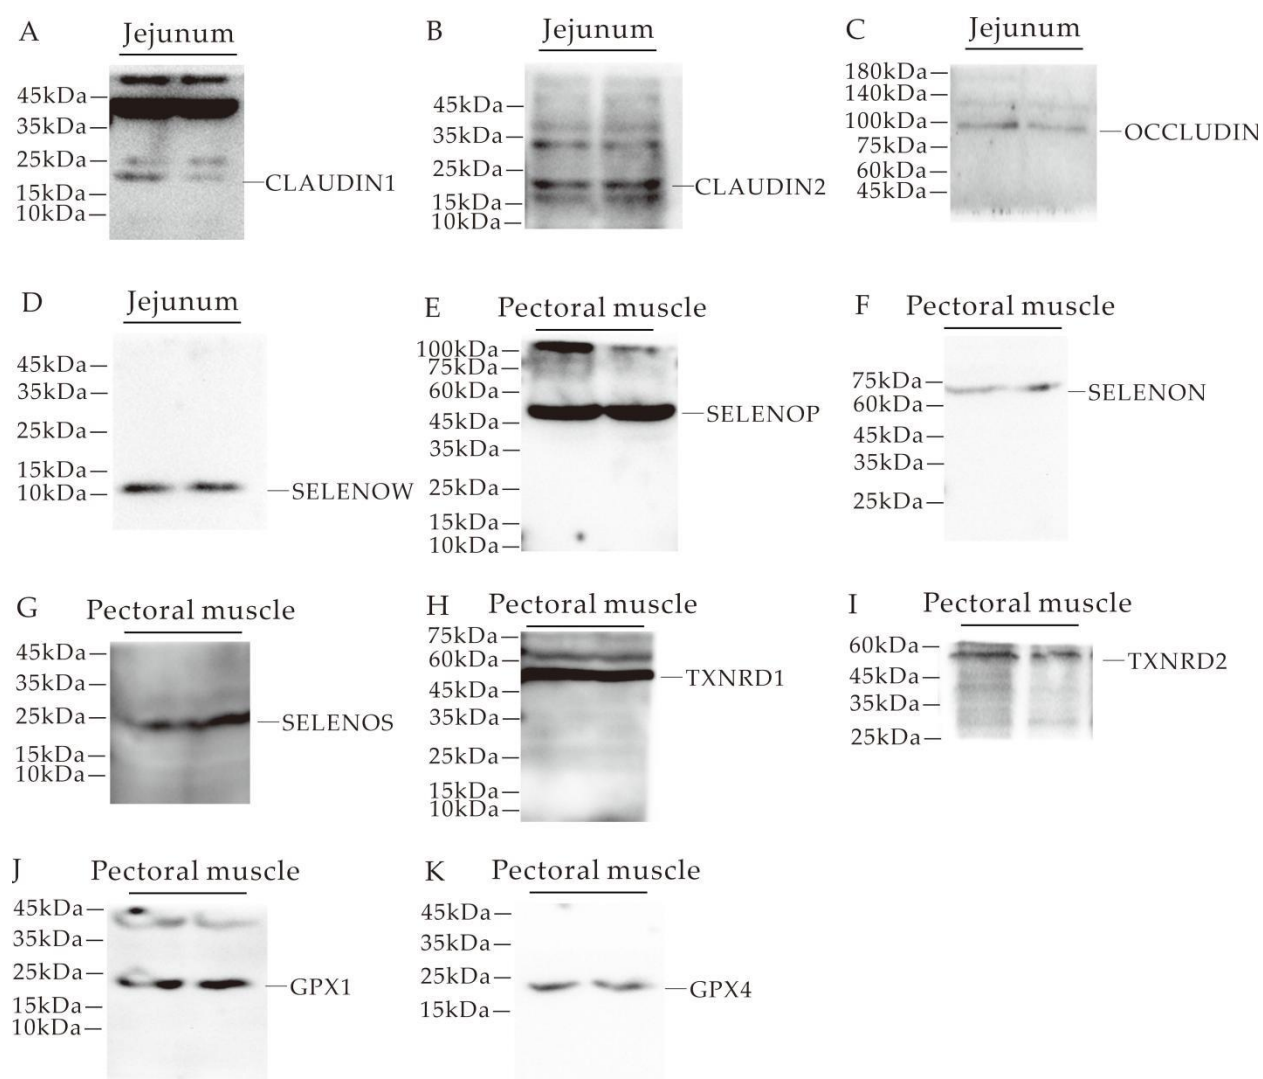

**Figure S2:** Validation of the specificity of antibodies against and the correct bands of CLAUDIN1, CLAUDIN2, OCCLUDIN, SELENOW, SELENOP, SELENON, SELENOS, TXNRD1, TXNRD2, GPX1 and GPX4, Western blot gel bands of CLAUDIN1 (A), CLAUDIN2 (B), OCCLUDIN (C) and SELENOW (D) were verified with broiler jejenum samples, and SELENOP (E), SELENON (F), SELENOS (G), TXNRD1 (H), TXNRD2 (I), GPX1 (J) and GPX4 (K) were verified with broiler pectoral muscle samples.
